# Supplementary material for: Effect of Kisspeptin-Type Neuropeptide on Locomotor Behavior and Muscle Physiology in the Sea Cucumber Apostichopus japonicus
Source: MDPI journal article supplement (doi:10.3390/ani13040705), 2023-02-17
Supplement: s1 [file s1]

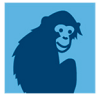

## Article

# Effect of Kisspeptin-type Neuropeptide on Locomotor Behavior and Muscle Physiology in the Sea Cucumber *Apostichopus japonicus*

Xueying Guo<sup>1,2,3,4,5</sup>, Libin Zhang<sup>1,2,3,4,5,6,\*</sup>, Kang Xiao<sup>7</sup>

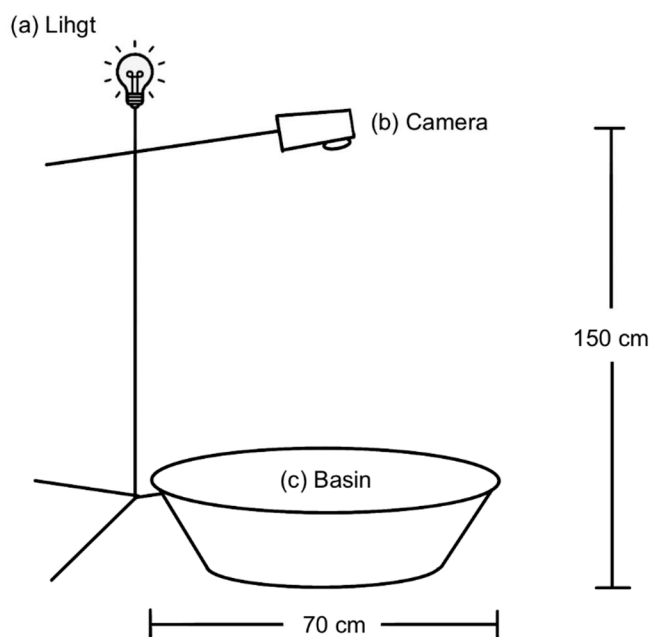

**Supplementary Figure 1.** The schematic of the shooting conditions. (a) The light source is a 5w bulb. (b) The camera used in the experiment is TLC200 time lapse video camera (Brinno, Taiwan, China). The camera is about 150 cm from the ground. (c) Each experimental sea cucumber was shot independently in a white plastic basin (70 cm in diameter, water line 7 cm).

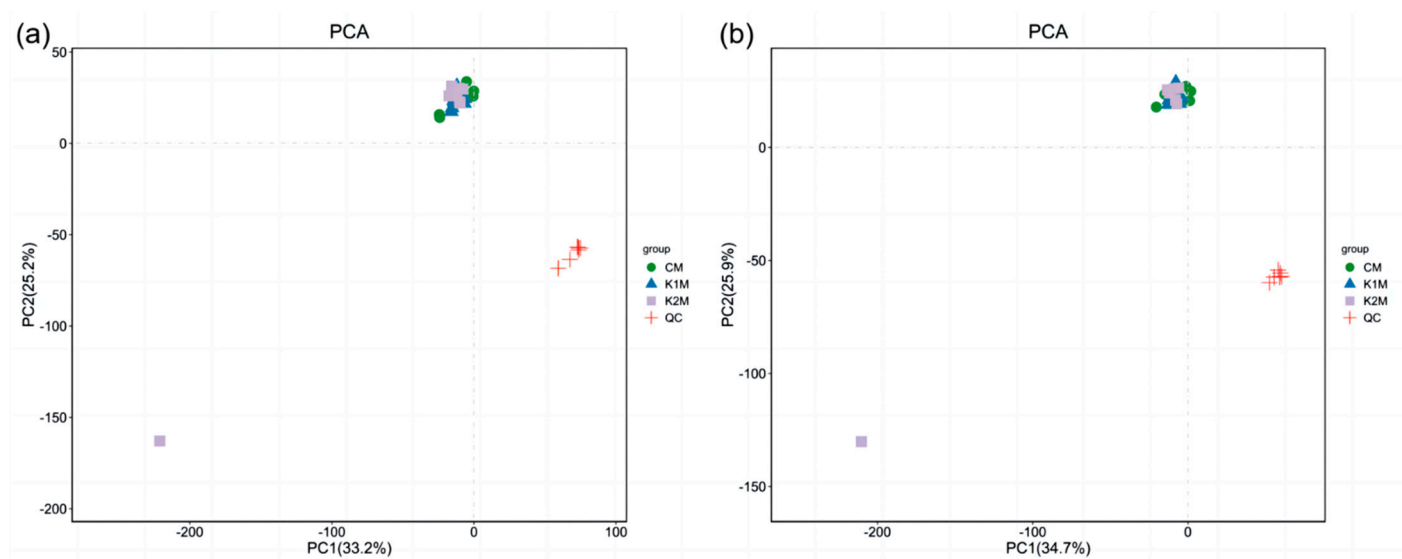

**Supplementary Figure 2.** PCA diagram for quality control. QC samples are densely distributed, indicating reliable data.

(a) Positive ion mode; (b) negative ion mode.

**Supplementary Table 1.** Differential metabolites of treatment groups (K1M and K2M) compared with the control group in positive and negative ion mode.

| Groups | Metabolites                                | Ion mode | RT (min) | <i>p</i> -value | VIP   | Regulation |
|--------|--------------------------------------------|----------|----------|-----------------|-------|------------|
| K1M    | Aminopyrrolnitrin                          | POS      | 361.09   | 0.05            | 25.35 | down       |
|        | alpha-Tocopherol succinate                 | POS      | 31.68    | 0.00            | 8.94  | up         |
|        | (+)-Chebulic acid                          | POS      | 358.79   | 0.04            | 4.13  | down       |
|        | N8-Acetylspermidine                        | POS      | 499.97   | 0.05            | 4.04  | down       |
|        | Ditalimfos                                 | POS      | 148.18   | 0.04            | 3.91  | up         |
|        | Deoxycytidine                              | POS      | 392.23   | 0.03            | 3.54  | down       |
|        | Fosetyl                                    | POS      | 195.56   | 0.00            | 2.81  | down       |
|        | (3E)-4-(2-Carboxyphenyl)-2-oxobut-3-enoate | POS      | 302.56   | 0.04            | 2.45  | up         |
|        | erythro-3-Hydroxy-Ls-aspartate             | POS      | 425.81   | 0.04            | 2.40  | down       |
|        | 3-Hydroxy-N6,N6,N6-trimethyl-L-lysine      | POS      | 547.64   | 0.03            | 2.36  | up         |
|        | N7-Methylguanosine                         | POS      | 99.36    | 0.04            | 2.03  | up         |
|        | PC(18:2(9Z,12Z)/18:0)                      | POS      | 101.64   | 0.04            | 1.96  | up         |
|        | Tazobactam                                 | POS      | 148.13   | 0.04            | 1.79  | up         |
|        | 3,3'-Dichlorobenzidine                     | POS      | 293.36   | 0.02            | 1.78  | up         |
|        | 3,5-Dinitroguaiacol                        | POS      | 391.19   | 0.05            | 1.73  | down       |

|     |                                                                                             |     |        |      |       |      |
|-----|---------------------------------------------------------------------------------------------|-----|--------|------|-------|------|
|     | 1-Methyladenosine                                                                           | POS | 147.98 | 0.05 | 1.70  | up   |
|     | alpha-D-Galactopyranuronosyl-(1->4)-alpha-D-galactopyranuronosyl-(1->4)-D-galacturonic acid | POS | 31.42  | 0.00 | 1.64  | up   |
|     | Methyl 2-propenyl selenide                                                                  | POS | 286.51 | 0.00 | 1.60  | down |
|     | Molybdopterinprecursor Z                                                                    | POS | 31.37  | 0.00 | 1.46  | up   |
|     | PC(24:1(15Z)/14:1(9Z))                                                                      | POS | 169.58 | 0.03 | 1.20  | up   |
|     | Chlorophenol red                                                                            | POS | 358.79 | 0.03 | 1.19  | down |
|     | PE(P-18:1(11Z)/22:5(4Z,7Z,10Z,13Z,16Z))                                                     | POS | 39.35  | 0.04 | 1.15  | up   |
|     | Luteolin 7-O-[beta-D-glucuronosyl-(1->2)-beta-D-glucuronide]-4'-O-beta-D-glucuronide        | POS | 169.58 | 0.00 | 1.12  | up   |
|     | Psicofuranine                                                                               | POS | 64.81  | 0.03 | 1.12  | up   |
|     | 3-Acetamidobutanal                                                                          | POS | 68.39  | 0.01 | 1.03  | up   |
|     | 3,3'-Dihydroxy-4',5,7-trimethoxyflavan                                                      | POS | 294.49 | 0.01 | 1.02  | up   |
|     | 2,4-Dinitroaniline                                                                          | POS | 272.16 | 0.03 | 1.02  | down |
|     | Norepinephrine sulfate                                                                      | POS | 100.46 | 0.04 | 1.00  | up   |
|     | Palmitoleic acid                                                                            | NEG | 40.66  | 0.02 | 13.01 | up   |
|     | 4-Dodecylbenzenesulfonic Acid                                                               | NEG | 26.97  | 0.05 | 7.65  | down |
|     | Tectorigenin 4'-sulfate                                                                     | NEG | 38.31  | 0.04 | 3.17  | up   |
|     | 3',5'-Cyclic CMP                                                                            | NEG | 30.47  | 0.00 | 2.16  | up   |
|     | Adenine                                                                                     | NEG | 269.60 | 0.05 | 1.98  | down |
|     | Diethylphthalic acid                                                                        | NEG | 62.05  | 0.04 | 1.98  | down |
|     | L-Serine                                                                                    | NEG | 399.11 | 0.01 | 1.78  | down |
|     | Purine mononucleotide                                                                       | NEG | 38.20  | 0.02 | 1.34  | up   |
|     | Methaneselenol                                                                              | NEG | 147.05 | 0.04 | 1.22  | up   |
|     | Glycine                                                                                     | NEG | 398.15 | 0.05 | 1.19  | up   |
|     | 2',3'-Cyclic UMP                                                                            | NEG | 30.51  | 0.00 | 1.13  | up   |
|     | [5-(Aminomethyl)furan-3-yl]methyl diphosphate                                               | NEG | 360.91 | 0.04 | 1.10  | down |
|     | 2,6-Dichlorophenol-4-(1,4-phthoquinone imine)                                               | NEG | 30.51  | 0.01 | 1.02  | up   |
|     | Uridine                                                                                     | NEG | 170.12 | 0.01 | 1.01  | down |
| K2M | N-Acryloylglycine                                                                           | POS | 395.50 | 0.00 | 15.68 | down |
|     | DL-Glutamate                                                                                | POS | 409.49 | 0.04 | 8.25  | down |
|     | 2,6-Dimethylpyrazine                                                                        | POS | 359.95 | 0.01 | 5.55  | down |

|                                                   |         |        |      |      |      |
|---------------------------------------------------|---------|--------|------|------|------|
| Turicine                                          | POS     | 334.83 | 0.04 | 4.13 | down |
| 2,5-Furandicarboxylate                            | POS     | 327.36 | 0.02 | 4.06 | down |
| Dihydrozeatin                                     | POS     | 392.46 | 0.04 | 3.93 | up   |
| Dichlozoline                                      | POS     | 237.39 | 0.03 | 3.77 | down |
| 2-Ethylidihydro-3(2H)-thiophenone                 | POS     | 395.45 | 0.00 | 3.74 | down |
| Oxamate                                           | POS     | 367.93 | 0.02 | 3.66 | down |
| N8-Acetylspermidine                               | POS     | 499.97 | 0.05 | 3.26 | down |
| D-Glutamine                                       | POS/NEG | 436.47 | 0.01 | 2.90 | down |
| 3-hydroxy-2-isobutyrate                           | POS     | 321.93 | 0.03 | 2.75 | up   |
| Homogentisate                                     | POS     | 358.81 | 0.02 | 2.53 | down |
| Aniline                                           | POS     | 261.25 | 0.03 | 2.32 | down |
| (2E)-Butenoyl-CoA                                 | POS     | 58.44  | 0.04 | 2.31 | down |
| Valyl-Alanine                                     | POS     | 399.31 | 0.02 | 2.31 | down |
| Aminoacetone                                      | POS     | 363.19 | 0.02 | 2.17 | down |
| 2-Azetidinecarboxylic acid                        | POS     | 409.52 | 0.04 | 2.06 | down |
| (R)-Dihydromaleimide                              | POS     | 133.00 | 0.01 | 1.82 | down |
| 4-Aminohippuric acid                              | POS     | 353.03 | 0.03 | 1.81 | down |
| S-Acetyldihydrolipoamide                          | POS     | 374.90 | 0.03 | 1.78 | down |
| (2R)-2-Hydroxy-2-methylbutanenitrile              | POS     | 95.95  | 0.01 | 1.58 | up   |
| Dihydroxyfumarate                                 | POS     | 395.50 | 0.00 | 1.57 | down |
| S-Prenyl-L-cysteine                               | POS     | 363.36 | 0.04 | 1.41 | up   |
| Chlorophenol red                                  | POS     | 358.79 | 0.01 | 1.37 | down |
| Alanyl-Arginine                                   | POS     | 447.60 | 0.05 | 1.35 | down |
| 4,6-Dihydroxy-2-quinolinecarboxylic acid          | POS     | 154.66 | 0.02 | 1.32 | down |
| Thiodiglycol                                      | POS     | 282.99 | 0.02 | 1.29 | up   |
| Aldosine                                          | POS     | 308.17 | 0.02 | 1.26 | down |
| Methyl 2-propenyl selenide                        | POS     | 324.86 | 0.05 | 1.19 | up   |
| PE-                                               |         |        |      |      |      |
| NMe2(18:4(6Z,9Z,12Z,15Z)/20:5(5Z,8Z,11Z,14Z,17Z)) | POS     | 409.59 | 0.01 | 1.10 | down |
| 1-Pyrrolidinecarboxaldehyde                       | POS     | 209.29 | 0.02 | 1.09 | up   |
| PC(18:4(6Z,9Z,12Z,15Z)/P-18:1(11Z))               | POS     | 409.60 | 0.01 | 1.08 | down |
| Chloranocryl                                      | POS     | 349.59 | 0.04 | 1.08 | down |

|                                                        |         |        |      |       |      |
|--------------------------------------------------------|---------|--------|------|-------|------|
| 5-Aminopentanamide                                     | POS     | 317.51 | 0.03 | 1.00  | up   |
| L-Aspartic acid                                        | POS/NEG | 416.33 | 0.00 | 11.67 | down |
| 4-Dodecylbenzenesulfonic Acid                          | NEG     | 26.97  | 0.02 | 9.48  | down |
| 2-phosphonato-D-glycerate(3-)                          | NEG     | 362.04 | 0.04 | 8.60  | down |
| Pyrrolidonecarboxylic acid                             | NEG     | 312.28 | 0.03 | 6.53  | down |
| Stearic acid                                           | NEG     | 38.23  | 0.04 | 6.02  | down |
| D-Alanine                                              | NEG     | 367.80 | 0.02 | 5.87  | down |
| gamma-Aminobutyric acid                                | NEG     | 408.34 | 0.01 | 5.39  | down |
| Pyroglutamic acid                                      | NEG     | 408.54 | 0.01 | 5.12  | down |
| Flupropate                                             | NEG     | 409.06 | 0.00 | 4.06  | down |
| Sarcosine                                              | NEG     | 416.30 | 0.00 | 3.57  | down |
| 1-(5-Phospho-D-ribosyl)-5-amino-4-imidazolecarboxylate | NEG     | 26.89  | 0.02 | 2.70  | down |
| D-Malic acid                                           | NEG     | 438.64 | 0.04 | 2.16  | down |
| Fumaric acid                                           | NEG     | 415.33 | 0.00 | 2.05  | down |
| 3-Methyl-2-oxovaleric acid                             | NEG     | 55.47  | 0.05 | 1.86  | up   |
| D-Aspartic acid                                        | NEG     | 438.65 | 0.01 | 1.81  | down |
| 5-Fluorodeoxyuridine monophosphate                     | NEG     | 25.50  | 0.04 | 1.79  | down |
| Diethyl phthalic acid                                  | NEG     | 62.05  | 0.02 | 1.47  | down |
| Citric acid                                            | NEG     | 520.64 | 0.02 | 1.41  | down |
| Prostaglandin G2                                       | NEG     | 51.20  | 0.01 | 1.30  | down |
| O-Phosphorylhydroxylamine                              | NEG     | 416.32 | 0.00 | 1.20  | down |

Ion mode: positive (POS) or negative (NEG); RT: retention time (min); *p* value: VIP (variable importance in the projection); and regulation trend of the metabolites.
